# Supplementary material
Source: PubMed Central journal article supplement (PMC2682860)
Supplement: M808337200_1.pdf [file M808337200_1.pdf]

# Friedman et al. supplementary data

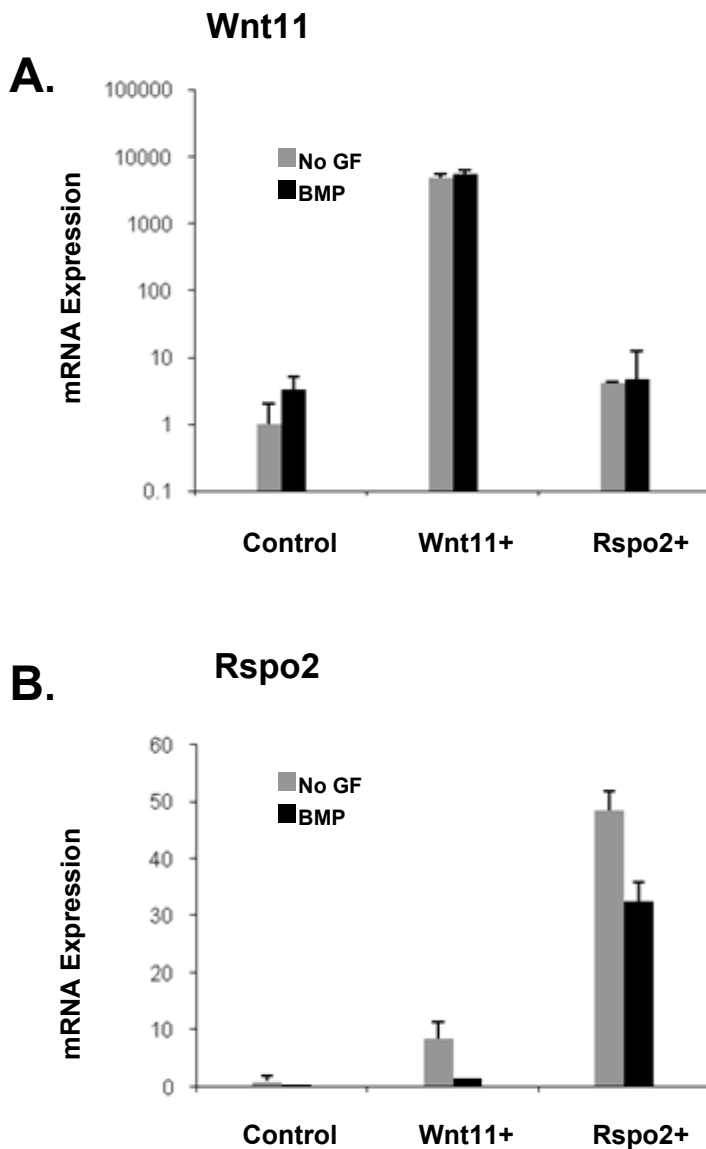

**Figure S1. Wnt11 and Rspo2 expression in control and retrovirally infected cells.** MC3T3 control (GFP), Wnt11+, or Rspo2+ cells were placed in osteogenic conditions with or without BMP. The cells were harvested for RNA after nine days of osteo-induction. Gene expression was subsequently analyzed by Q-RT-PCR. **A.** Wnt11. **B.** Rspo2. Expression values represent fold change in gene expression relative to non-BMP treated controls, normalized to beta-actin.

-1.5 kb      cacttttCAAAGttggg  
-1 kb        ggaaaaaCAAAGccaag  
-.9 kb        gtgctaaCAAAGggccc

**Figure S2. Subsequence analysis of the Rspo2 promoter.** Genomatix program was used to analyze a 2 Kb region of the Rspo2 promoter including part of the first exon. Three Tcf/Lef consensus sites were identified.

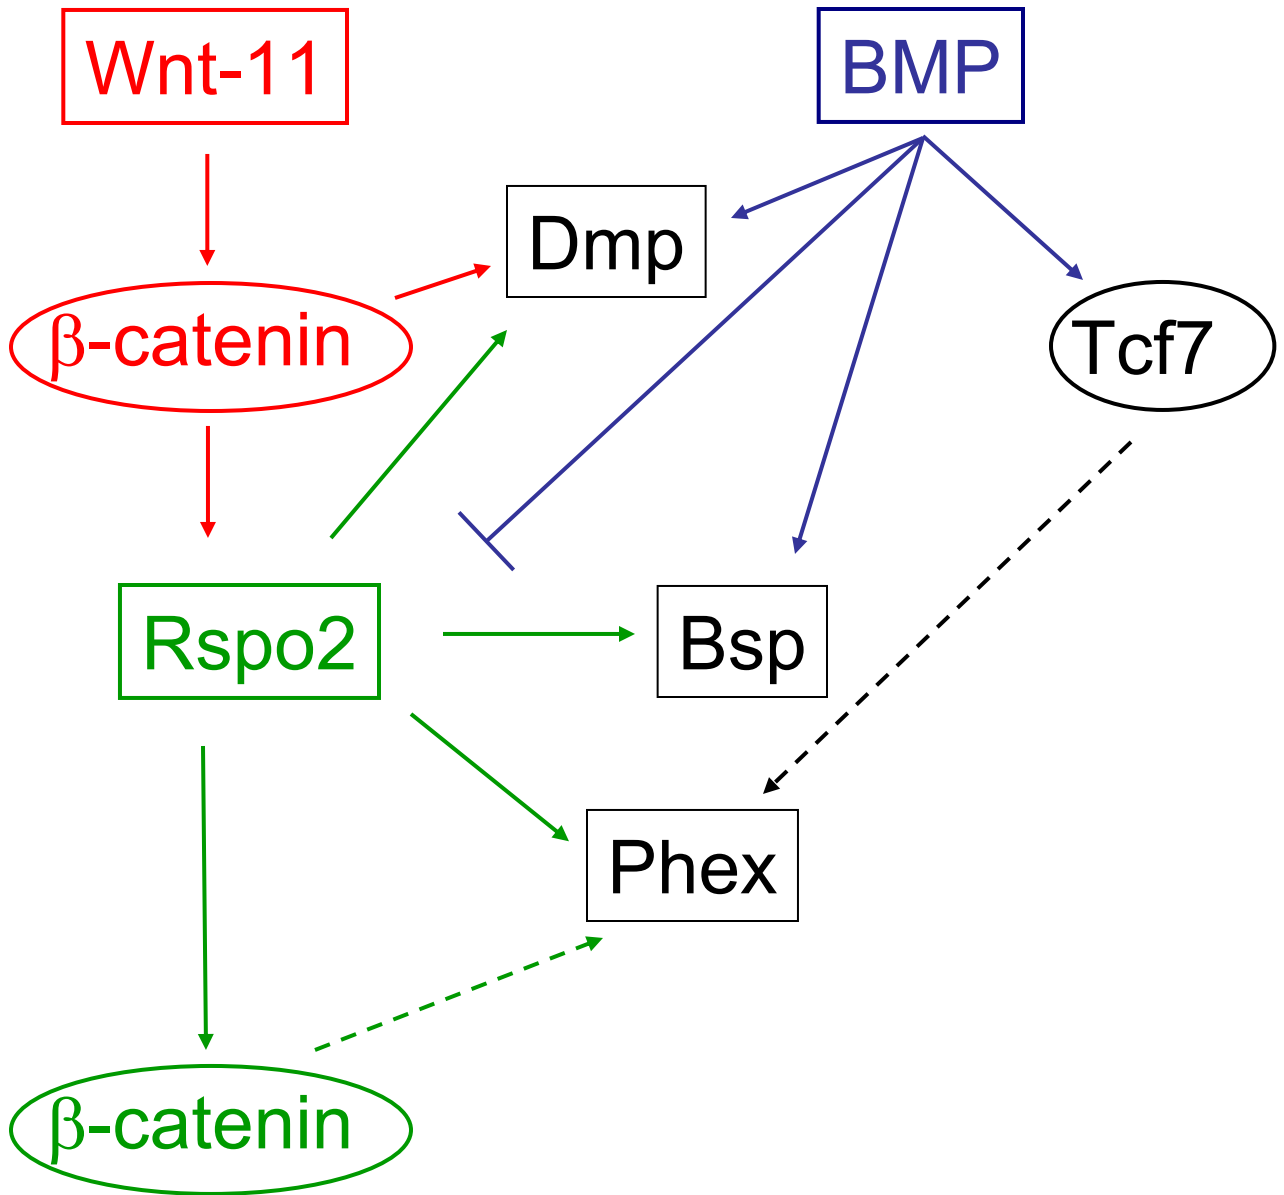

**Figure S3. Model of Wnt11/Rspo2 mediated osteoblast differentiation.** In this model BMP increases the expression of TCF7, DMP, and BSP and inhibits Rspo2 expression. Wnt11 increases nuclear accumulation of beta-catenin, which is required for increased Rspo2 expression. Coordinated BMP-Wnt signaling, possibly through Tcf7-beta-catenin in addition to other BMP regulated pathways (Smad/MAPK), is required for increased DMP. Rspo2 on the other hand can directly increase DMP, BSP, and Phex gene expression and increase beta-catenin nuclear accumulation. This beta-catenin signaling may partially influence Phex expression, which requires BMP (Tcf7). These results suggest that Phex and BSP are two factors that could be required for the enhanced mineralization promoted by Wnt11 through Rspo2.

Table S1A. BMP Regulated Transcription Factors, ECM, Proteoglycans

| Name                                   | Gene Title | Description                                                                                            |
|----------------------------------------|------------|--------------------------------------------------------------------------------------------------------|
| <b>Transcription Factors Increased</b> |            |                                                                                                        |
| Id1                                    | U43884     | inhibitor of DNA binding 1                                                                             |
| Junb                                   | NM_008416  | Jun-B oncogene                                                                                         |
| Tcf7                                   | AI323642   | transcription factor 7, T-cell specific                                                                |
| klf4                                   | BG069413   | Kruppel-like factor 4 (gut)                                                                            |
| Dlx3                                   | U79738     | distal-less homeobox 3                                                                                 |
| Tcf7                                   | NM_009331  | transcription factor 7, T-cell specific                                                                |
| Klf10                                  | NM_013692  | Kruppel-like factor 10                                                                                 |
| Sp7                                    | NM_130458  | trans-acting transcription factor 7,<br>Osterix                                                        |
| Tbx2                                   | NM_009324  | T-box 2                                                                                                |
| Rcor2                                  | NM_054048  | REST corepressor 2                                                                                     |
| <b>Transcription Factors Decreased</b> |            |                                                                                                        |
| Id4                                    | BB121406   | inhibitor of DNA binding 4                                                                             |
| <b>ECM, Proteoglycans Increased</b>    |            |                                                                                                        |
| Lepre1                                 | NM_019783  | leprecan 1                                                                                             |
| Hapln1                                 | NM_013500  | hyaluronan and proteoglycan link protein<br>1                                                          |
| Cspg4                                  | BB377873   | chondroitin sulfate proteoglycan 4                                                                     |
| Ibsp                                   | L20232     | integrin binding sialoprotein                                                                          |
| Col2a1                                 | NM_031163  | procollagen, type II, alpha 1                                                                          |
| Bglap1                                 | NM_007541  | bone gamma carboxyglutamate protein 1                                                                  |
| Gpc1                                   | NM_016696  | glypican 1                                                                                             |
| P4ha2                                  | 1417149_at | procollagen-proline, 2-oxoglutarate 4-<br>dioxygenase (proline 4-hydroxylase),<br>alpha II polypeptide |
| Loxl4                                  | NM_053083  | lysyl oxidase-like 4                                                                                   |
| Col11a2                                | AV242706   | procollagen, type XI, alpha 2                                                                          |
| <b>ECM, Proteoglycans Decreased</b>    |            |                                                                                                        |
| Otor                                   | AF243504   | otoraplin, cartilage-derived retinoic acid<br>sensitive protein                                        |
| Col8a1                                 | NM_007739  | procollagen, type VIII, alpha 1                                                                        |

**Table S1A. BMP regulated expression of transcription factors, ECM, and proteoglycans in pre-osteoblasts.** RNA was harvested at days 3, 6, and 9 after the start of osteo-induction. cRNA samples were hybridized to an Affymetrix 420A 2.0 microarray chip. Only genes showing an expression level  $\geq 400$  with an interquartile range  $>4$  were evaluated. The genes represented in this table showed increased or decreased expression at day 9 in BMP treated cells relative to non-BMP treated GFP controls.

Table S1B. BMP Regulated Receptors and Signal Transduction Molecules

| Name                                 | Gene Title | Description                                                                                        |
|--------------------------------------|------------|----------------------------------------------------------------------------------------------------|
| <b>Receptors Increased</b>           |            |                                                                                                    |
| Ly6a                                 | BC002070   | lymphocyte antigen 6 complex, locus A, Sca-1                                                       |
| Unc5b                                | BG065285   | unc-5 homolog B ( <i>C. elegans</i> )                                                              |
| Tnfrsf11b                            | AB013898   | tumor necrosis factor receptor superfamily, member 11b (osteoprotegerin)                           |
| Lifr                                 | D17444     | leukemia inhibitory factor receptor                                                                |
| Bambi                                | AF153440   | BMP and activin membrane-bound inhibitor, homolog ( <i>Xenopus laevis</i> )                        |
| Vldlr                                | NM_013703  | very low density lipoprotein receptor                                                              |
| Pthr1                                | BC013446   | parathyroid hormone receptor 1                                                                     |
| Vdr                                  | AV290079   | vitamin D receptor phosphate regulating gene with homologies to endopeptidases on the X chromosome |
| Phex                                 | NM_011077  |                                                                                                    |
| <b>Receptors Decreased</b>           |            |                                                                                                    |
| Cd34                                 | NM_133654  | CD34 antigen                                                                                       |
| <b>Signal Transduction Increased</b> |            |                                                                                                    |
| Rasa3                                | NM_009025  | RAS p21 protein activator 3                                                                        |
| Rras2                                | NM_025846  | related RAS viral (r-ras) oncogene homolog 2                                                       |
| Rassf5                               | NM_018750  | Ras association (RalGDS/AF-6) domain family 5                                                      |
| Ramp1                                | NM_016894  | receptor (calcitonin) activity modifying protein 1                                                 |
| Plcd1                                | NM_019676  | phospholipase C, delta 1                                                                           |
| Rab27b                               | BB121269   | RAB27b, member RAS oncogene family                                                                 |
| Jak2                                 | NM_008413  | Janus kinase 2                                                                                     |
| Gpr133                               | BB548889   | G protein-coupled receptor 133                                                                     |
| Gpr35                                | NM_022320  | G protein-coupled receptor 35                                                                      |
| Trib3                                | BB508622   | tribbles homolog 3 ( <i>Drosophila</i> )                                                           |
| <b>Signal Transduction Decreased</b> |            |                                                                                                    |
| Rhoj                                 | AF309564   | ras homolog gene family, member J                                                                  |
| Rgs2                                 | AF215668   | regulator of G-protein signaling 2                                                                 |

**Table S1B. BMP regulated expression of receptors and signal transduction molecules in pre-osteoblasts.** RNA was harvested at days 3, 6, and 9 after the start of osteo-induction. cRNA samples were hybridized to an Affymetrix 420A 2.0 microarray chip. Only genes showing an expression level  $\geq 400$  with an interquartile range  $>4$  were evaluated. The genes represented in this table showed increased or decreased expression at day 9 in BMP treated cells relative to non-BMP treated GFP controls.

Table S2. Wnt-11 Regulated Transcription Factors, ECM, Proteoglycans

| Name                                   | Gene Title | Description                                                                                                                     |
|----------------------------------------|------------|---------------------------------------------------------------------------------------------------------------------------------|
| <b>Transcription Factors Increased</b> |            |                                                                                                                                 |
| Sox6                                   | AJ010605   | SRY-box containing gene 6                                                                                                       |
| Ebf1                                   | BB125261   | early B-cell factor 1                                                                                                           |
| <b>ECM, Proteoglycans Increased</b>    |            |                                                                                                                                 |
| Pcolce2                                | AF352788   | procollagen C-endopeptidase enhancer 2                                                                                          |
| Hapln1                                 | NM_013500  | hyaluronan and proteoglycan link protein 1                                                                                      |
| Otor                                   | AF243504   | otoraplin, cartilage-derived retinoic acid sensitive protein                                                                    |
| Dmp1                                   | U65020     | dentin matrix protein 1                                                                                                         |
| Phex                                   | U73910     | phosphate regulating gene with homologies to endopeptidases on the X chromosome (hypophosphatemia, vitamin D resistant rickets) |
| <b>Secreted Factors Increased</b>      |            |                                                                                                                                 |
| Wif1                                   | BC004048   | Wnt inhibitory factor 1                                                                                                         |
| Igf1                                   | NM_010512  | insulin-like growth factor 1                                                                                                    |
| Rspo2                                  | BG067392   | R-spondin 2 homolog ( <i>Xenopus laevis</i> )                                                                                   |
| Lect1                                  | NM_010701  | leukocyte cell derived chemotaxin 1                                                                                             |
| <b>Receptors Increased</b>             |            |                                                                                                                                 |
| Ly6a                                   | BC002070   | lymphocyte antigen 6 complex, locus A, Sca-1                                                                                    |
| Vdr                                    | AV290079   | vitamin D receptor                                                                                                              |
| Ly6c                                   | NM_010741  | lymphocyte antigen 6 complex, locus C                                                                                           |
| Itga6                                  | BM935811   | integrin alpha 6                                                                                                                |
| Phex                                   | NM_011077  | phosphate regulating gene with homologies to endopeptidases on the X chromosome                                                 |
| <b>Signal Transduction Increased</b>   |            |                                                                                                                                 |
| Camk2b                                 | BG862223   | calcium/calmodulin-dependent protein kinase II, beta                                                                            |

**Table S2. Wnt11 regulated gene expression.** RNA was harvested at days 3, 6, and 9 after the start of osteo-induction. cRNA samples were hybridized to an Affymetrix 420A 2.0 microarray chip. Only genes showing an expression level  $\geq 400$  with an interquartile range  $>4$  were evaluated. The genes represented in this table showed increased or decreased expression at day 9 in non-BMP treated Wnt11+ cells relative to non-BMP treated controls.

Table S3 A. BMP+Wnt-11 Regulated Transcription Factors, ECM, Proteoglycans, and Secreted Factors

| Name                                   | Gene Title | Description                                   |
|----------------------------------------|------------|-----------------------------------------------|
| <b>Transcription Factors Increased</b> |            |                                               |
| Hmga1                                  | NM_016660  | high mobility group AT-hook 1                 |
| Egr2                                   | X06746     | early growth response 2                       |
| Junb                                   | NM_008416  | Jun-B oncogene                                |
| Foxc2                                  | NM_013519  | forkhead box C2                               |
| Fosl1                                  | U34245     | fos-like antigen 1                            |
| Nfatc1                                 | NM_016791  | nuclear factor of activated T-cells,          |
| <b>ECM, Proteoglycans Increased</b>    |            |                                               |
| Dmp1                                   | U65020     | dentin matrix protein 1                       |
| Tnfrsf25                               | NM_009398  | tumor necrosis factor alpha induced protein 6 |
| Ereg                                   | NM_007950  | epiregulin                                    |
| Otor                                   | AF243504   | otoraplin                                     |
| <b>ECM, Proteoglycans Decreased</b>    |            |                                               |
| Aspn                                   | NM_025711  | asporin                                       |
| <b>Secreted Factors Increased</b>      |            |                                               |
| Ctgf                                   | NM_010217  | connective tissue growth factor               |
| Il12a                                  | AF128210   | interleukin 12a                               |
| Adm                                    | NM_009627  | adrenomedullin                                |
| Bmp8a                                  | NM_007558  | bone morphogenetic protein 8a                 |
| Rspo2                                  | BG067392   | R-spondin 2 homolog ( <i>Xenopus laevis</i> ) |
| <b>Secreted Factors Decreased</b>      |            |                                               |
| Igfbp5                                 | BF225802   | insulin-like growth factor binding protein 5  |

Table S3 B. BMP+Wnt-11 Regulated Receptors and Signal Transduction Molecules

| Name                                 | Gene Title   | Description                                                                                           |
|--------------------------------------|--------------|-------------------------------------------------------------------------------------------------------|
| <b>Receptors Increased</b>           |              |                                                                                                       |
| Ank                                  | NM_020332    | progressive ankylosis phosphate regulating gene with homologies to endopeptidases on the X chromosome |
| Phex                                 | NM_011077    | homologies to endopeptidases on the X chromosome                                                      |
| <b>Receptors Decreased</b>           |              |                                                                                                       |
| Ptgfr                                | NM_008966    | prostaglandin F receptor                                                                              |
| <b>Signal Transduction Increased</b> |              |                                                                                                       |
| Rgs4                                 | NM_009062    | regulator of G-protein signaling 4                                                                    |
| Spry2                                | BB529691     | sprouty homolog 2 ( <i>Drosophila</i> )                                                               |
| Rab27b                               | BB121269     | RAB27b, member RAS oncogene family                                                                    |
| Ptgs2                                | M94967       | prostaglandin-endoperoxide synthase 2                                                                 |
| Gprc5b                               | BC020004     | G protein-coupled receptor, family C, group 5, member B                                               |
| Rgs16                                | U94828       | regulator of G-protein signaling 16                                                                   |
| <b>Signal Transduction Decreased</b> |              |                                                                                                       |
| Ddit4                                | AK017926     | DNA-damage-inducible transcript 4/REDD1                                                               |
| Plekha5                              | 1425543_s_at | pleckstrin homology domain containing, family A member 5                                              |
| Osr1                                 | NM_011859    | odd-skipped related 1 ( <i>Drosophila</i> )                                                           |

**Table S3. Genes showing additive or synergistic changes in expression with Wnt11 and BMP** Microarray analysis was performed and analyzed as previously mentioned. The genes represented in this table showed increased or decreased expression at day 9 in BMP treated Wnt11+ cells relative to BMP treated controls.
